# Supplementary material
Source: PubMed Central journal article supplement (PMC4273943)
Supplement: NIHMS648762-supplement-Supplementary_data.pdf [file NIHMS648762-supplement-Supplementary_data.pdf]

## SUPPLEMENTAL INFORMATION

### Supplementary Figures and Tables

**Figure S1:** Analyses cyst cell formation in wild-type,  $\Delta rc1\_3783$  and  $\Delta rc1\_3788$  strains after 3 days growth on encystment inducing agar solidified CENS-8xN media. Strains were cultured overnight in liquid CENS media, concentrated 20x then spotted in 5  $\mu$ l aliquots onto plates. Media supplemented with nucleotides (cAMP, AMP, ADP, ATP, cGMP, GMP, GDP, GTP) had final concentrations of 50  $\mu$ M. Following macroscopic morphology observations, colonies were used in wet mounts observations of cellular morphologies. **(a)** In all conditions assayed, the wild-type colonies were dry and ridged, whereas the  $\Delta rc1\_3783$  and  $\Delta rc1\_3788$  strains consistently appeared shiny and vegetative, with the exception of the  $\Delta rc1\_3783$  strain in the presence of cGMP. **(b)** In microscopic observations cyst cells were detected within wild-type colonies under all conditions assayed, and in the  $\Delta rc1\_3783$  strains only when grown in the presence of cGMP. No cyst cells were detected in the  $\Delta rc1\_3788$  strain under any condition assayed.

**Figure S2:** Thermal denaturation resistance of RC1\_3788 in the presence of **(a)** cGMP and **(b)** cAMP. Both panels depict negative derivative curves of RC1\_3788 (10  $\mu$ M) thermal denaturation in response to increasing ligand concentration. Ligand concentrations (0, 10, 20, 30, 40  $\mu$ M) used were equivalent in both assays, and are respectively represented by the following marker and line color schemes: green, closed circle ( $\bullet$ ); magenta, closed triangle ( $\blacktriangle$ ); blue, closed square ( $\blacksquare$ ); black, open circle ( $\circ$ ); red, crossed lines ( $\times$ ). Panel **(c)** depicts the  $\Delta T_m$  ( $^{\circ}$ C) of RC1\_3788 in the presence of increasing cAMP (open circles,  $\circ$ ) or cGMP (closed circles,  $\bullet$ ) relative to RC1\_3788 without ligand.

**Figure S3:** Representative ITC titrations of cGMP **(a)** and cAMP **(b)** into WT RC1\_3788 dimer. Lines of best-fit were generated based on one-site (cAMP) and two site sequential binding (cGMP) sites (See Table 2 for fitted parameters).

Figure S1

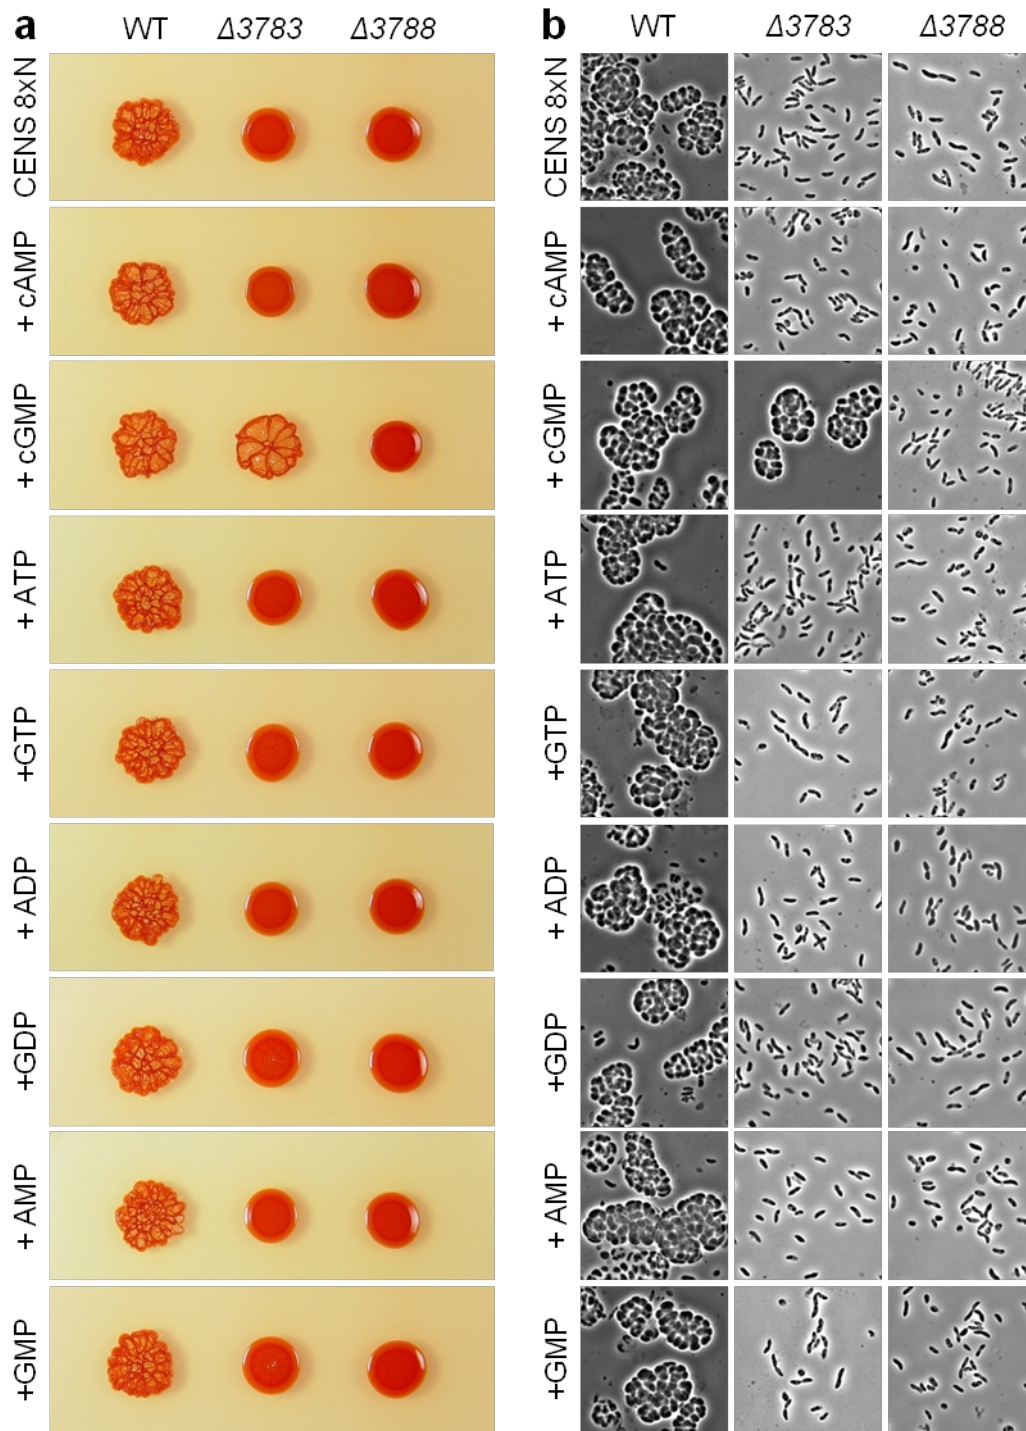

Figure S2

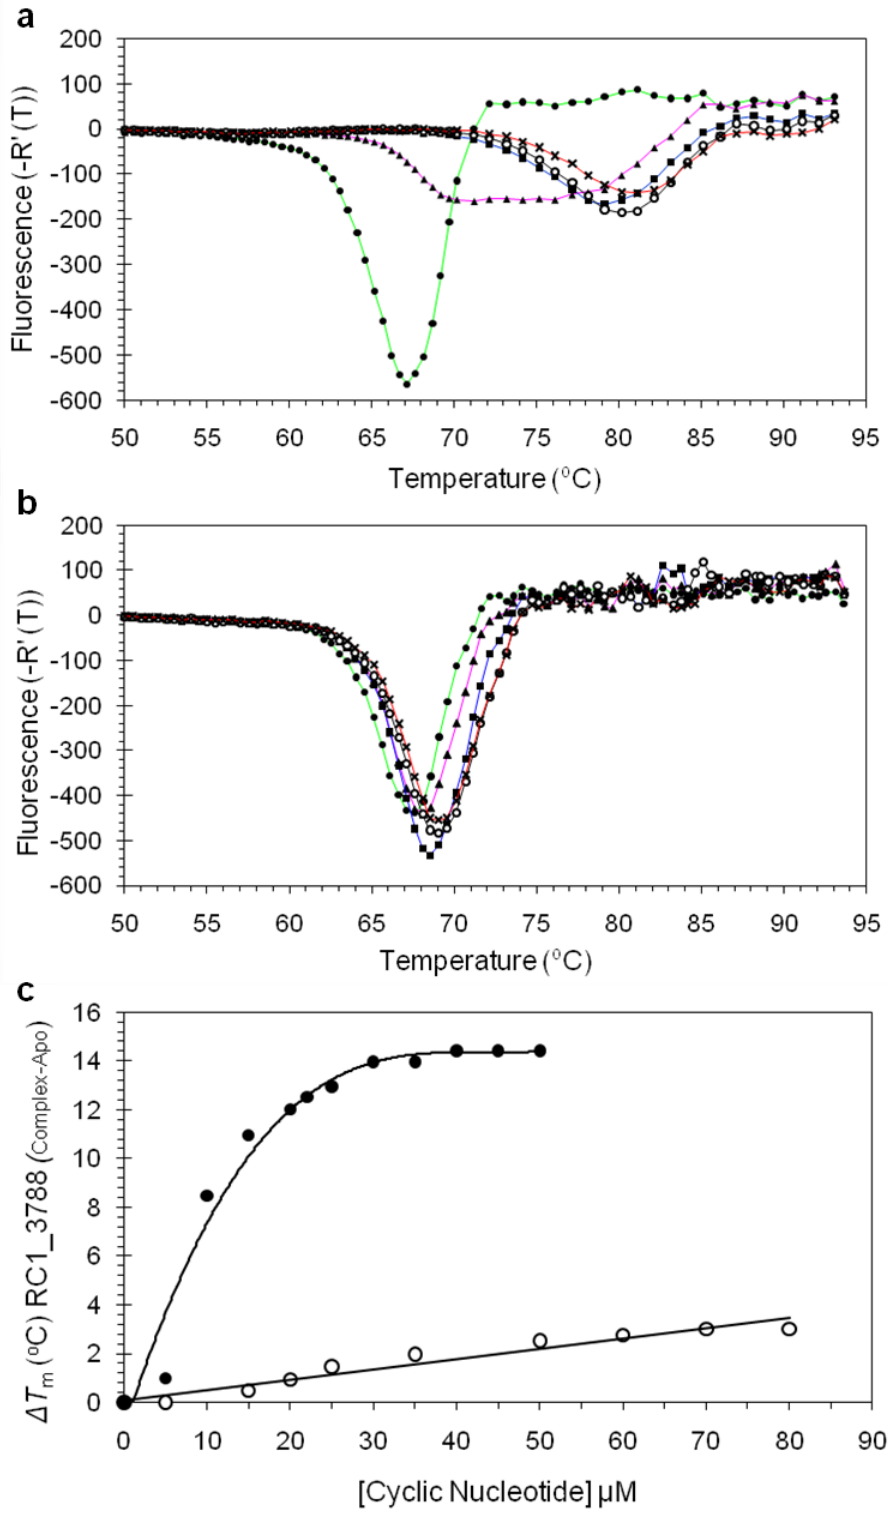

Figure S3

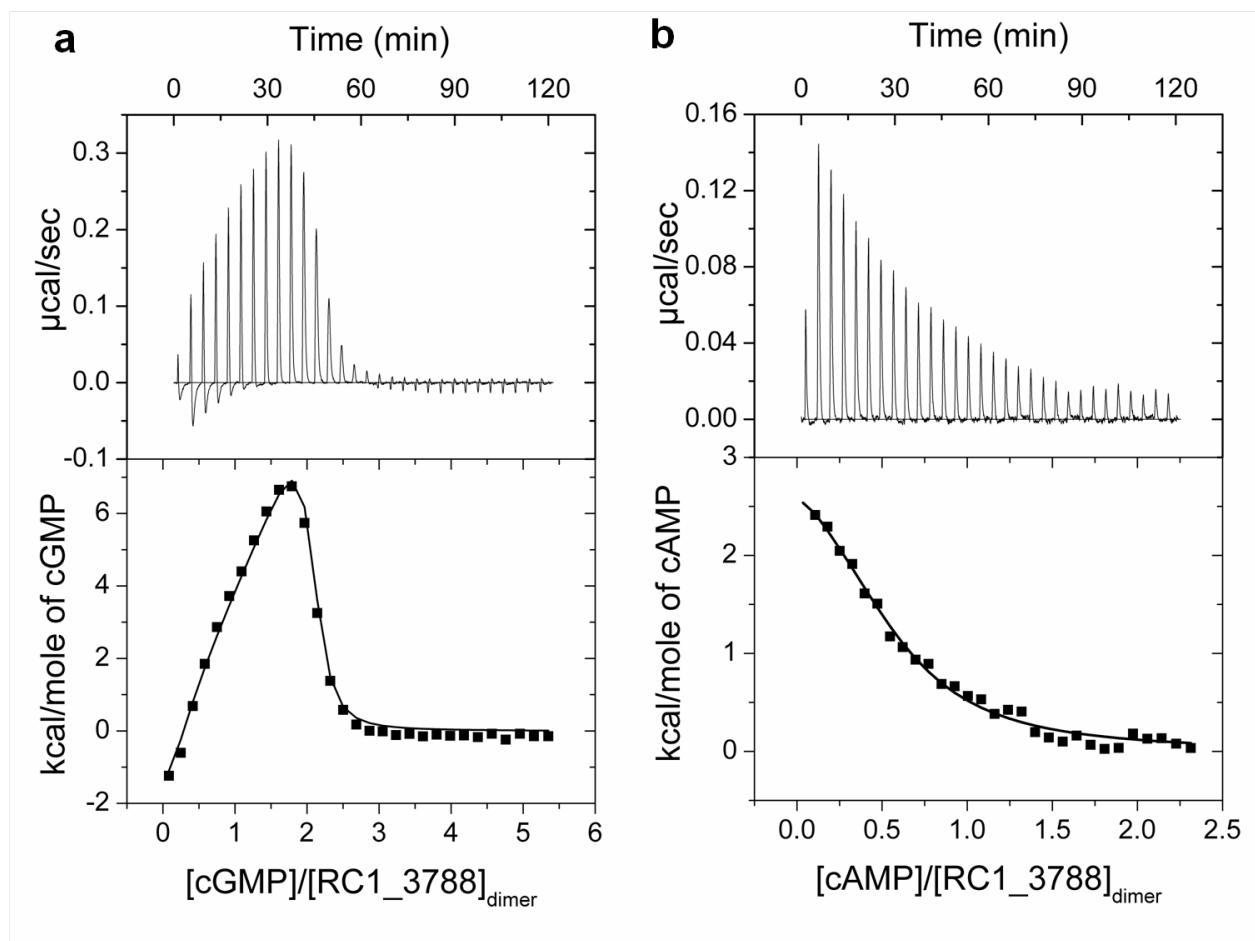

**Table S1:** PCR Primers used for the construction of chromosomal deletion suicide plasmids, protein overexpression and sequencing. Restriction sequences are boldfaced.

| Primer Use                            | Primer Name            | Primer Sequence (5'-3')                |
|---------------------------------------|------------------------|----------------------------------------|
| RC1_3783 Overexpression               | <i>rc1_3783Ndel-f</i>  | <b>CATATGGCGACGAGCGGAAGCACA</b>        |
|                                       | <i>rc1_3783Sbfl-r</i>  | CTTCTT <b>CCTGCAGGA</b> ATGCGT         |
|                                       | <i>rc1_3783Sbfl-f</i>  | ACGCATT <b>CCTGCAGGA</b> AAGAAG        |
|                                       | <i>rc1_3783XhoI-r</i>  | <b>CTCGAGGACCCTGGACTAGCGGCC</b>        |
| RC1_3788 Overexpression               | <i>rc1_3788Ndel-f</i>  | <b>CATATGACGCCCGTGCCCAGCGA</b>         |
|                                       | <i>rc1_3788XhoI-r</i>  | <b>CTCGAGTCAGCCGGCGAGCTTCTCCA</b>      |
| <i>rc1_3783</i> Clean Deletion        | <i>rc1_3783Sacl-f</i>  | GGAGAG <b>CTCAGA</b> ACGACTACGAGCGCAT  |
|                                       | <i>rc1_3783EcoRV-r</i> | GGAGATAT <b>CTGTGCTTCCGCTCGTCGCC</b>   |
|                                       | <i>rc1_3783EcoRV-f</i> | GGAGATAT <b>CTTCGCCACGCTCCCGGCTG</b>   |
|                                       | <i>rc1_3783XbaI-r</i>  | GGAT <b>CTAGAGTGTGAACTGCTT</b> CACACG  |
| <i>rc1_3786</i> Clean Deletion        | <i>rc1_3786Sacl-f</i>  | GGAGAG <b>CTCGCTGATGAGCTGGCCGTCCAC</b> |
|                                       | <i>rc1_3786SpeI-r</i>  | GGA <b>ACTAGTT</b> CGGCGGGGAGTCCGGTCAT |
|                                       | <i>rc1_3786SpeI-f</i>  | GGA <b>ACTAGTGGGT</b> ACCGCCCACTGATCC  |
|                                       | <i>rc1_3786XbaI-r</i>  | GAGT <b>CTAGATGCCCGTGCCGATGATGCCGC</b> |
| <i>rc1_3787</i> Clean Deletion        | <i>rc1_3787Sacl-f</i>  | GGAGAG <b>CTCATCCGGCCGGCGATCGGCTGC</b> |
|                                       | <i>rc1_3787SpeI-r</i>  | GGA <b>ACTAGTCGTGGGGCCGAGGAAGACGAT</b> |
|                                       | <i>rc1_3787SpeI-f</i>  | GGA <b>ACTAGTATCCTGGGTGCAGCCGCATGA</b> |
|                                       | <i>rc1_3787XbaI-r</i>  | GAGT <b>CTAGAACCGTGTCTCGATGATGGCG</b>  |
| <i>rc1_3788</i> Clean Deletion        | <i>rc1_3788Sacl-f</i>  | GGAGAG <b>CTCTGGAGGACGATGACGAGGTC</b>  |
|                                       | <i>rc1_3788EcoRV-r</i> | GGAGATAT <b>CCTTTGTGTGCTGGGCACGG</b>   |
|                                       | <i>rc1_3788EcoRV-f</i> | GGAGATAT <b>CTACCTGATCGTCCACGACACG</b> |
|                                       | <i>rc1_3788XbaI-r</i>  | GCAT <b>CTAGACGGTGGGCCGATTCTGGCTG</b>  |
| Sequencing of Mini-Tn5 Disrupted Loci | Mini-Tn5-f             | CTGTTCTTCTACGGCAAG                     |
|                                       | Mini-Tn5-r             | CACAGCCAAACTATCAGG                     |
